# Supplementary material
Source: PubMed Central journal article supplement (PMC5537137)
Supplement: NIHMS767808-supplement-Figures_1-11__Tables_1-2.pdf [file NIHMS767808-supplement-Figures_1-11__Tables_1-2.pdf]

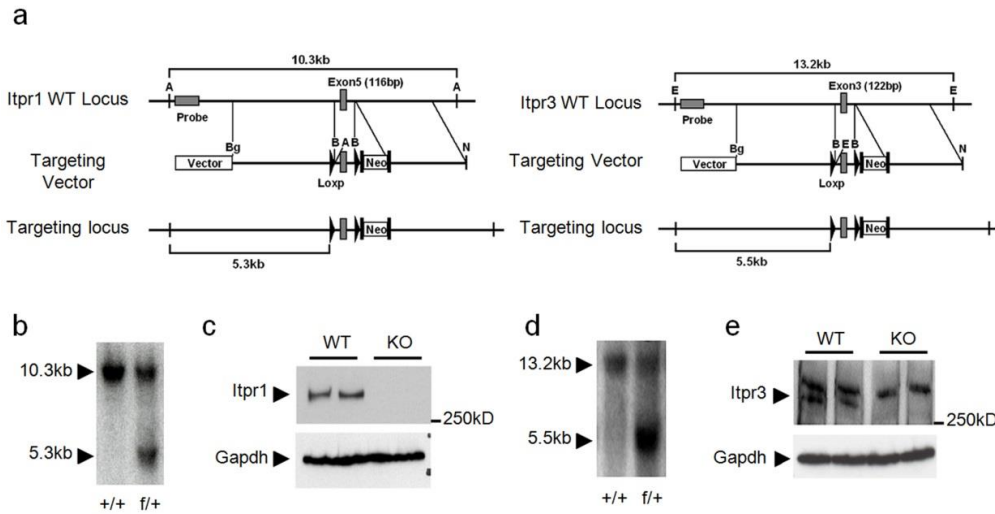

**Supplementary Figure 1: Gene targeting strategies to generate *Itp1* and *Itp3* knockout mice.**

**a)** Targeting strategies for *Itp1* and *Itp3* genes. A restriction map of the relevant genomic regions (top), the targeting vectors (middle) and the targeted locus after recombination (bottom) is shown. The targeting construct was generated by flanking exon 5 of *Itp1* (**a**) and exon 3 of *Itp3* (**d**) with loxP sites, while flt sites flank the Neo-cassette. A, *Acc65I*; B, *BamHI*; Bg, *BglII*; E, *EcoRV*; N, *NotI*. Neo represents the neomycin resistance gene; while the arrowheads represent loxP sites and the long boxes represent flt sites. **b)** Detection of wild type (WT) and targeted alleles for the *Itp1* gene by DNA Southern blot analysis. DNAs isolated from neo positive electroporated ES cell clones were digested with *Acc65I* and analyzed by DNA blot analysis with the probe as shown in (**a**). The 10.3- and 5.3-kb bands represent the WT and targeted alleles, respectively. **c)** Detection of Itp1 by protein analysis. Proteins were prepared from the brains of neonatal WT and Itp1-knockout (KO) mice, and analyzed with Itp1 antibodies. **d)** Detection of WT and targeted alleles for the *Itp3* gene by DNA Southern blot analysis, DNAs were digested with *NotI*. The 13.2- and 5.5-kb bands represent WT and targeted alleles, respectively. **e)** Detection of Itp3 by protein analysis. Proteins were prepared from the placenta of WT and Itp3-null (KO) mice, and analyzed with Itp3 antibodies.

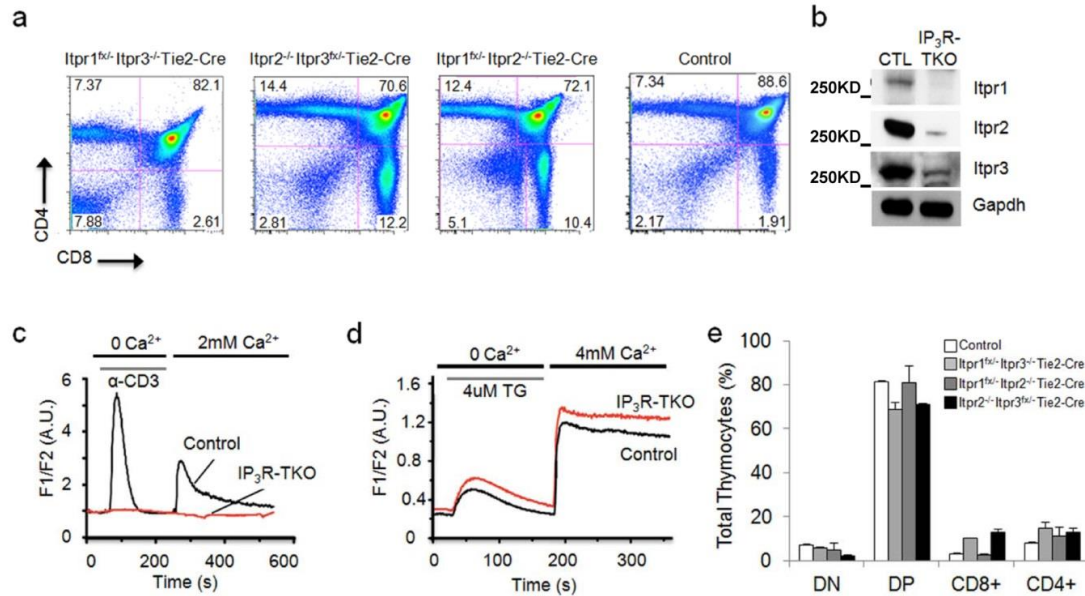

**Supplementary Figure 2: Conditional deletion of *Itp3* in mouse thymocytes.**

**a)** Surface CD4 and CD8 expression of adult *Itp3* conditional double knockout thymi. **b)** Western blot of *Itp3* expression from ED 17.5 control (CTL) and IP<sub>3</sub>R-TKO thymi. **c)** Ca<sup>2+</sup> influx in adult control and IP<sub>3</sub>R-TKO thymocytes in response to crosslinking of TCR with anti-CD3 antibody and **d)** after passive depletion of intracellular Ca<sup>2+</sup> stores by thapsigargin (TG), followed by reintroduction of extracellular Ca<sup>2+</sup>. Relative Ca<sup>2+</sup> levels were determined by ratiometric measurement with Fluo-5 (F1) and Fura-red (F2) Ca<sup>2+</sup> indicator dyes. A.U., arbitrary units. Data are representative of a minimum of three independent experiments. All animals displaying signs of malignant disease were excluded from these analyses. **e)** Quantification of surface CD4 and CD8 expression of adult *Itp3* conditional double knockout thymi in **(a)**. Data are expressed as percentage of total thymocytes (mean ± SEM, n=3 for all genotypes).

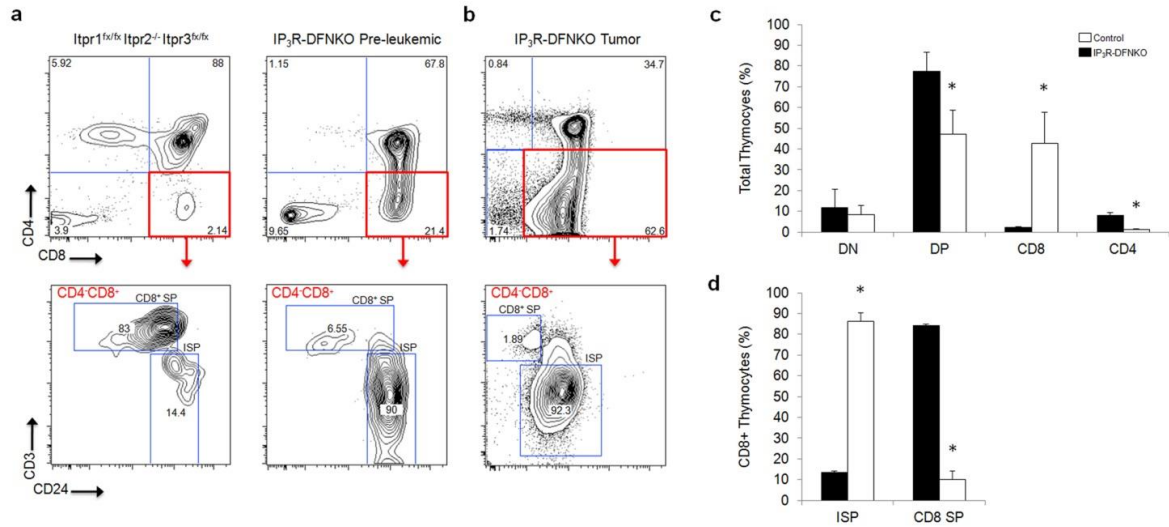

**Supplementary Figure 3: Accumulation of ISP thymocytes in pre-leukemic and tumor-burdened IP<sub>3</sub>R-DFNKO thymi.**

CD4 and CD8 surface expression (top) in thymi of pre-leukemic (a) and tumor-burdened (b) IP<sub>3</sub>R-DFNKO adult mice. CD8<sup>+</sup>CD4<sup>-</sup> thymocytes were subgated and surface expression of CD24 and CD3 (bottom) was examined (as in Figure 1). Numbers in plots indicate percentage of cells. Data are representative of a minimum of ten independent experiments. Age was not used to define these stages, as we observed significant variability in the age of onset and age of progression from normal (left column), pre-leukemic mice (middle column) and T-LBL burdened (right column) IP<sub>3</sub>R-TKO mice. c) Quantification of surface CD4 and CD8 expression of pre-leukemic IP<sub>3</sub>R-DFNKO adult thymi. Data are expressed as percentage of total thymocytes (mean ± SEM, Control, n=5; IP<sub>3</sub>R-DFNKO, n=4.). d) ISP and CD8<sup>+</sup> SP T cells as a percentage of total CD8<sup>+</sup> cells from data in (c). \*, p < 0.05, measured with two-tailed Student's t test.

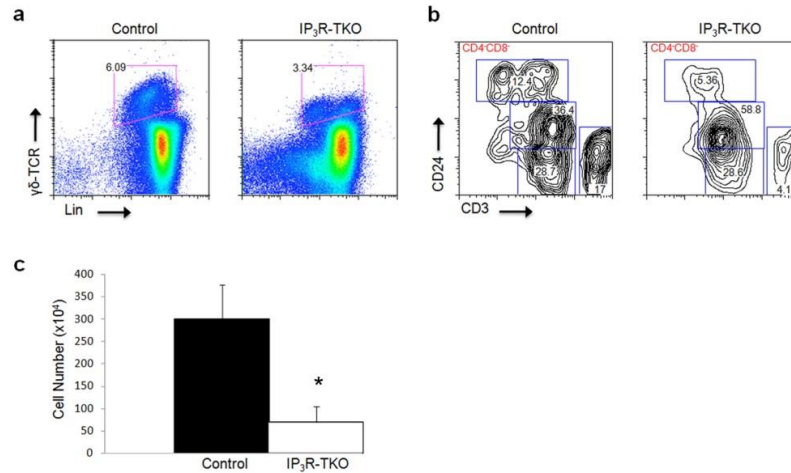

**Supplementary Figure 4:  $\gamma\delta$  T cell development is disrupted in IP<sub>3</sub>R-TKO mice.**

**a)** Expression of surface  $\gamma\delta$ -TCR after staining with lineage markers (CD3, CD4, CD8, B220, CD19, Mac-1, Gr-1, Ter-119) of 1-week-old neonate control and IP<sub>3</sub>R-TKO thymocytes. **b)** CD3 and CD24 expression in DN thymocytes of 1-week-old neonate control and IP<sub>3</sub>R-TKO mice. **c)** Total thymic cellularity of  $\gamma\delta$ -TCR<sup>+</sup> T cells in 1-week-old neonate control and IP<sub>3</sub>R-TKO mice. Data are representative of three independent experiments (mean  $\pm$  SEM). \*,  $p < 0.05$ , measured with two-tailed Student's t test.

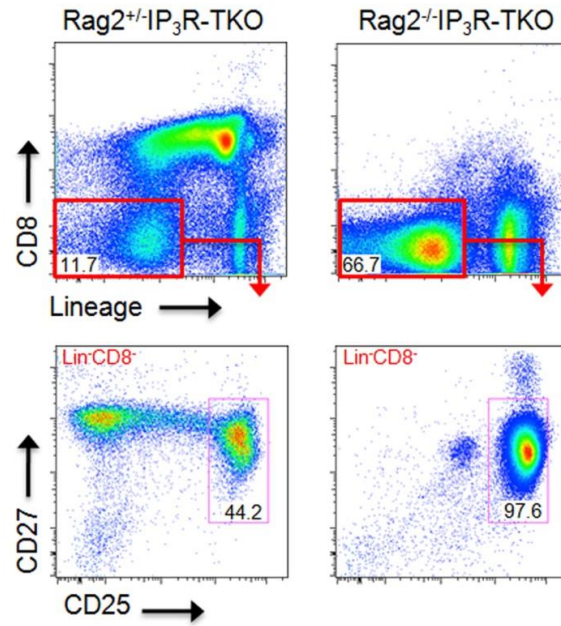

**Supplementary Figure 5: IP<sub>3</sub>R-Ca<sup>2+</sup> store depletion is not required for the enforcement of  $\beta$ -selection.** Thymocytes from 6-week-old IP<sub>3</sub>R-TKO Rag2<sup>+/-</sup> and IP<sub>3</sub>R-TKO Rag2<sup>-/-</sup> were stained for lineage markers (CD3, CD4, Mac1, Gr1, Ter119, B220,  $\gamma\delta$ -TCR) and surface CD8 expression (top). CD8<sup>+</sup>Lineage<sup>+</sup> thymocytes were then sub-gated and examined for surface CD27 and CD25 expression (bottom). Data are representative of three independent experiments.

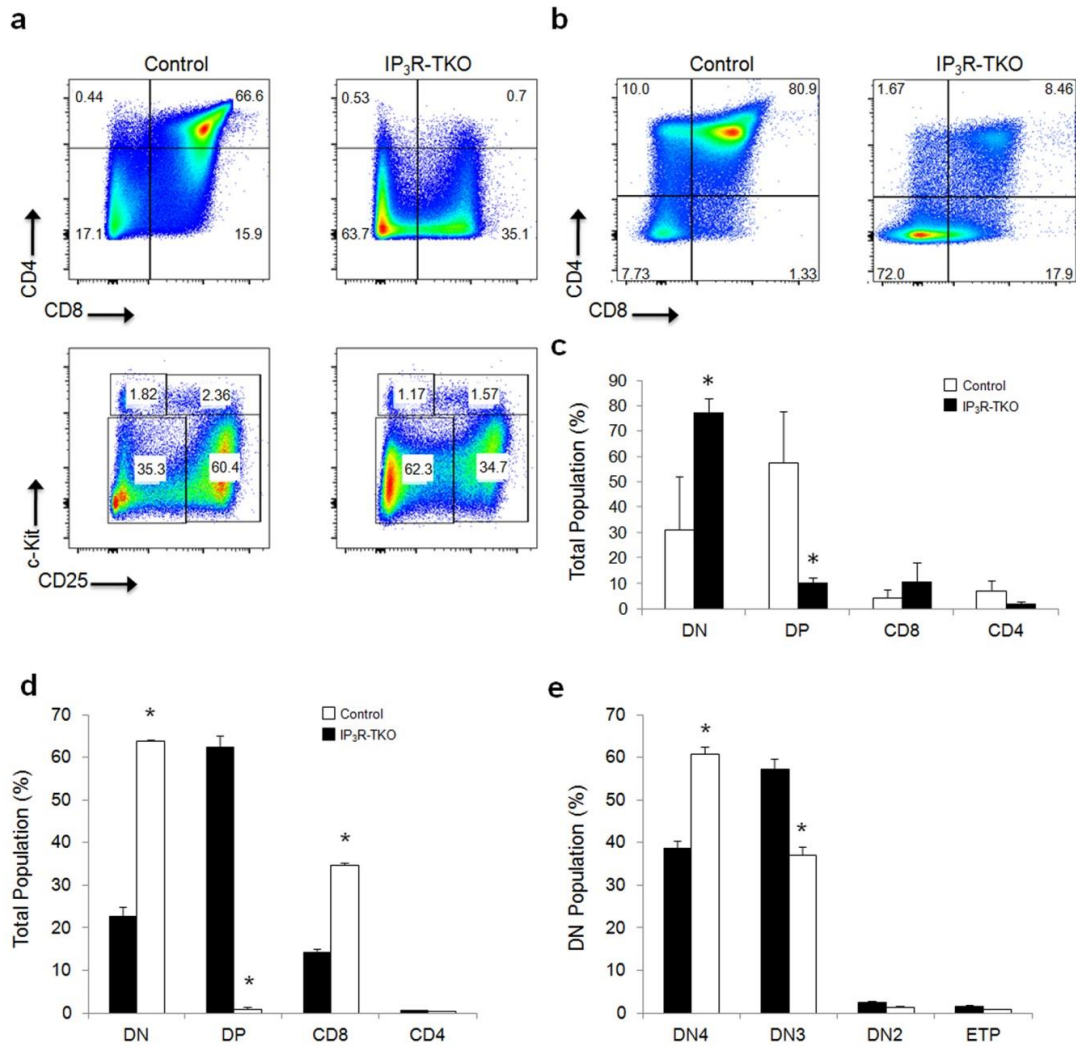

**Supplementary Figure 6: Thymocyte accumulation in IP<sub>3</sub>R-TKO mice is due to inefficient transition of precursors through the post  $\beta$ -selection stages of development.**

**a)** Expression of surface CD4 and CD8 in ED 17.5 thymocytes (top) of control and IP<sub>3</sub>R-TKO mice. CD3<sup>+</sup>CD4<sup>+</sup>CD8<sup>-</sup> (DN) thymocytes were then sub-gated and examined for surface CD25 and c-Kit expression (bottom). **b)** Sca-1<sup>+</sup> hematopoietic stem and progenitor cells purified from ED 14.5 fetal livers of control and IP<sub>3</sub>R-TKO mice were cultured on OP9-DL1 stromal cells for twelve days and examined for expression of surface CD4 and CD8. Data are representative of **(a)** two and **(b)** three independent experiments. **c)** Surface CD4 and CD8 expression in **(b)**, expressed as percentage of total population (mean  $\pm$  SEM, n=3). **d)** Surface CD4 and CD8 expression in **(a)**, top row, expressed as a percentage of total cells (mean  $\pm$  SEM, control, n=6; IP<sub>3</sub>R-TKO, n=3). **e)** Surface CD25 and c-Kit expression of CD3<sup>+</sup>DN cells **(a)**, bottom row, expressed as a percentage of total CD3<sup>+</sup>DN cells (mean  $\pm$  SEM, control, n=6; IP<sub>3</sub>R-TKO, n=3). \*, p < 0.01, measured with two-tailed Student's t test.

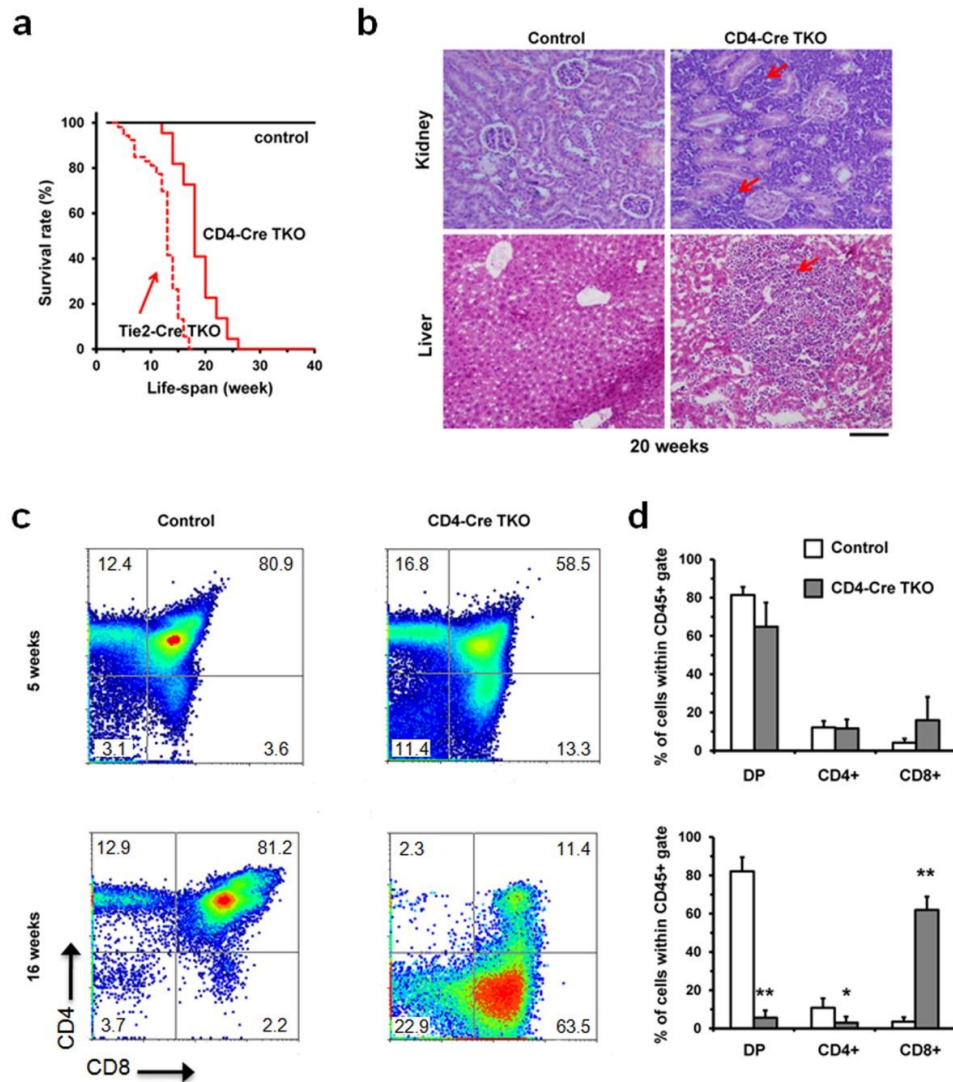

**Supplementary Figure 7: CD4-Cre IP<sub>3</sub>R TKO mice develop premature lethality, tumors, and abnormal T cell development.**

**a)** Kaplan-Meier survival curve of control, CD4-Cre TKO and Tie2-Cre TKO mice (control, n>100; CD4-Cre TKO, n=22; Tie-Cre TKO, n>100). **b)** Histological analysis showed leukocyte infiltration (arrow) in kidney and liver of CD4-Cre TKO mice at the age of 20 weeks. Scale bars: 100  $\mu$ m. **c)** Expression of surface CD4 and CD8 in control and CD4-Cre TKO thymocytes at the age of 5 weeks (left, upper; control, n = 5; CD4-Cre TKO, n = 3) and 16 weeks (left, bottom; control, n = 4; CD4-Cre TKO, n = 4), and the percentage of each cell subset (**d**). Data are presented as mean  $\pm$  SEM. \*, p<0.05; \*\*, p<0.01, measured with two-tailed Student's t test.

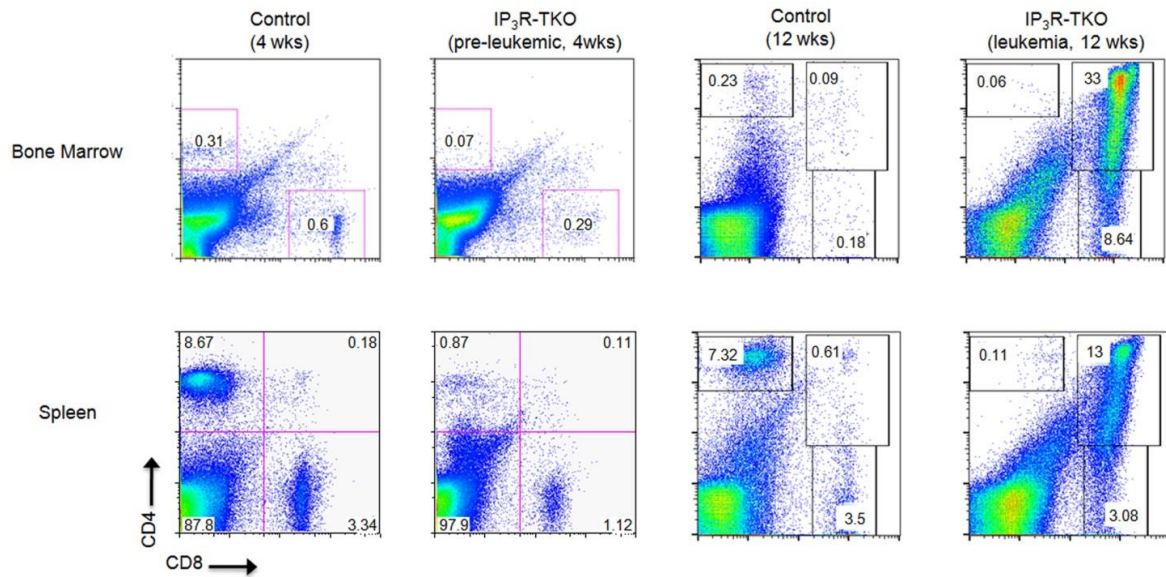

**Supplementary Figure 8: Leukemic blasts are present in bone marrow and spleen of moribund IP<sub>3</sub>R-TKO mice.**

Expression of surface CD4 and CD8 reveal T-ALL blasts present in IP<sub>3</sub>R-TKO bone marrow (**top**, leukemia, 12wks) and spleen (**bottom**, leukemia, 12wks). Adult (4wks) Cre-negative control and pre-leukemic IP<sub>3</sub>R-TKO bone marrow and spleen are included for comparison, as well an age-matched Cre-negative littermate control (12wks). Data are representative of a minimum of five experiments.



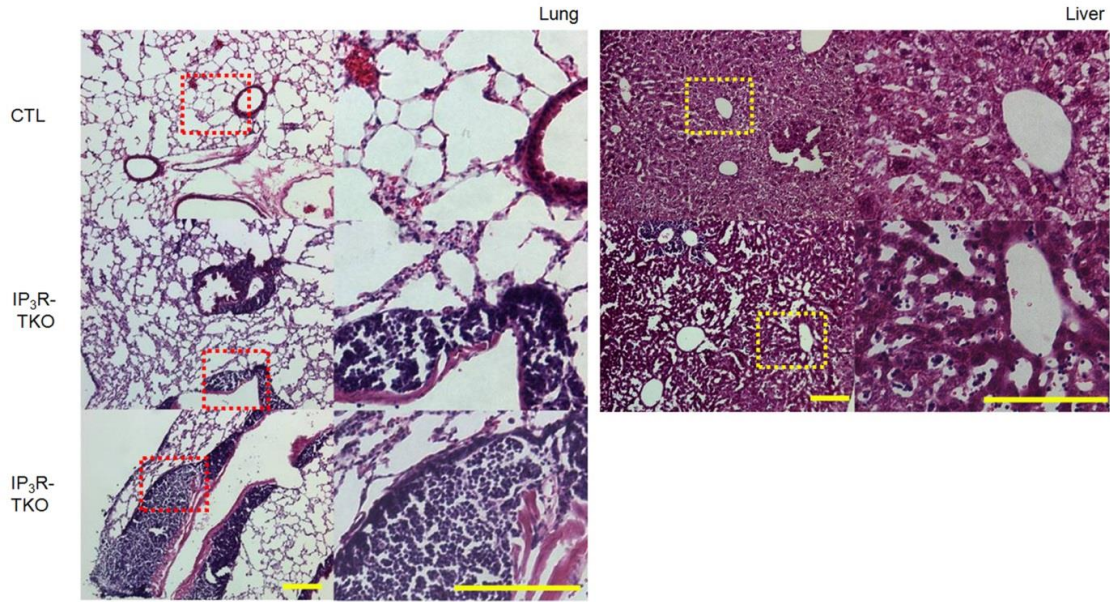

**Supplementary Figure 9: Leukocyte infiltration into lung and liver of moribund IP<sub>3</sub>R-TKO mice.**

H&E staining of lung (left) samples (red dashed boxes represent image area magnified on right) and liver (yellow dashed boxes represent image area magnified on right). Scale bars: 200 $\mu$ m.

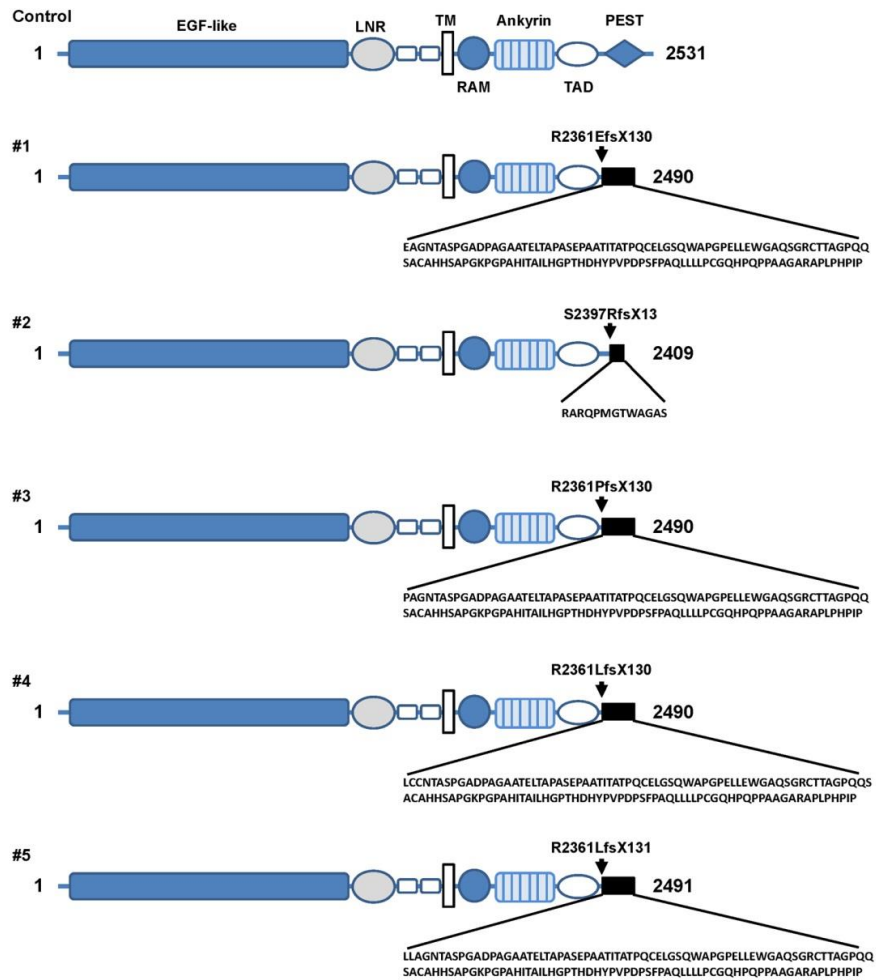

**Supplementary Figure 10: Mutations in the Notch1 gene identified in IP<sub>3</sub>R-TKO thymi.**

Schematic representation of control and predicted truncated Notch1 proteins translated from mRNA carrying frame-shift mutations. Black boxes indicate amino acid sequences (elaborated below) predicted from the new reading frame following the identified mutations.

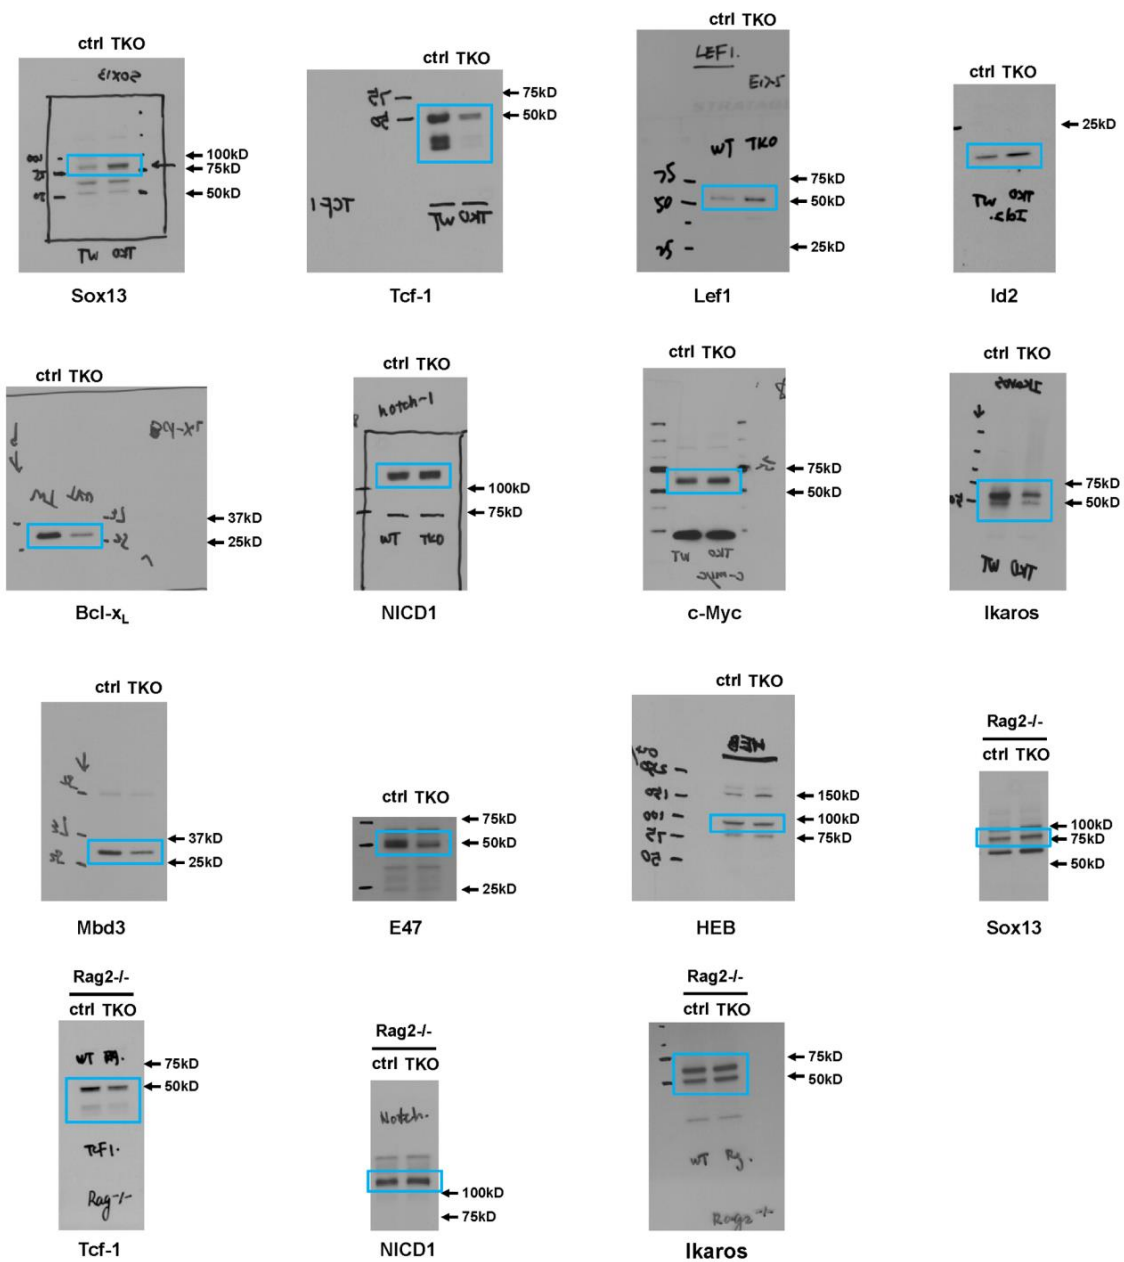

Supplementary Figure 11: The original Western blots in the paper. Uncropped Western blots of Figure 3d, e.

**Supplementary Table 1. KEGG pathway analysis: GO terms enriched in ISP thymocyte gene set.**

| ID       | Term                                                   | Count | %    | P-Value  | Fold Enrichment | Bonferroni | Benjamini | FDR          |
|----------|--------------------------------------------------------|-------|------|----------|-----------------|------------|-----------|--------------|
| mmu04510 | Focal adhesion                                         | 47    | 0.47 | 1.72E-17 | 4.20            | 2.67E-15   | 2.67E-15  | 2.07<br>E-14 |
| mmu04512 | ECM-receptor interaction                               | 29    | 0.29 | 2.01E-15 | 6.19            | 3.10E-13   | 1.55E-13  | 2.40<br>E-12 |
| mmu05410 | Hypertrophic cardiomyopathy (HCM)                      | 25    | 0.25 | 1.30E-11 | 5.27            | 2.01E-09   | 6.69E-10  | 1.56<br>E-08 |
| mmu05412 | Arrhythmogenic right ventricular cardiomyopathy (ARVC) | 22    | 0.22 | 3.93E-10 | 5.19            | 6.10E-08   | 1.52E-08  | 4.72<br>E-07 |
| mmu05414 | Dilated cardiomyopathy                                 | 24    | 0.24 | 6.76E-10 | 4.62            | 1.05E-07   | 2.09E-08  | 8.11<br>E-07 |
| mmu04020 | Calcium signaling pathway                              | 34    | 0.34 | 4.22E-09 | 3.15            | 6.54E-07   | 1.09E-07  | 5.07<br>E-06 |
| mmu02010 | ABC transporters                                       | 13    | 0.13 | 4.41E-06 | 5.12            | 6.83E-04   | 9.76E-05  | 5.29<br>E-03 |
| mmu05222 | Small cell lung cancer                                 | 17    | 0.17 | 1.58E-05 | 3.54            | 2.44E-03   | 3.06E-04  | 0.019        |
| mmu04530 | Tight junction                                         | 22    | 0.22 | 1.72E-05 | 2.89            | 2.67E-03   | 2.97E-04  | 0.021        |
| mmu04810 | Regulation of actin cytoskeleton                       | 29    | 0.29 | 2.68E-05 | 2.37            | 4.14E-03   | 4.15E-04  | 0.032        |
| mmu04730 | Long-term depression                                   | 14    | 0.14 | 1.55E-04 | 3.44            | 0.024      | 2.18E-03  | 0.19         |
| mmu04260 | Cardiac muscle contraction                             | 14    | 0.14 | 3.55E-04 | 3.18            | 0.054      | 4.57E-03  | 0.43         |
| mmu04010 | MAPK signaling pathway                                 | 30    | 0.30 | 3.79E-04 | 2.00            | 0.057      | 4.50E-03  | 0.45         |
| mmu05200 | Pathways in cancer                                     | 33    | 0.33 | 1.10E-03 | 1.81            | 0.16       | 0.012     | 1.31         |
| mmu05416 | Viral myocarditis                                      | 14    | 0.14 | 2.15E-03 | 2.64            | 0.28       | 0.022     | 2.55         |
| mmu04360 | Axon guidance                                          | 16    | 0.16 | 6.46E-03 | 2.16            | 0.63       | 0.061     | 7.49         |
| mmu04270 | Vascular smooth muscle contraction                     | 15    | 0.15 | 7.13E-03 | 2.21            | 0.67       | 0.063     | 8.23         |
| mmu04912 | GnRH signaling pathway                                 | 13    | 0.13 | 7.82E-03 | 2.37            | 0.70       | 0.065     | 9.00         |
| mmu04520 | Adherens                                               | 11    | 0.11 | 9.63E-03 | 2.56            | 0.78       | 0.076     | 10.97        |

|          |                                       |    |      |       |      |      |      |       |
|----------|---------------------------------------|----|------|-------|------|------|------|-------|
|          | junction                              |    |      |       |      |      |      |       |
| mmu00230 | Purine metabolism                     | 17 | 0.17 | 0.015 | 1.92 | 0.90 | 0.11 | 16.37 |
| mmu04144 | Endocytosis                           | 20 | 0.20 | 0.018 | 1.75 | 0.94 | 0.13 | 20.05 |
| mmu04012 | ErbB signaling pathway                | 11 | 0.11 | 0.023 | 2.24 | 0.97 | 0.15 | 24.80 |
| mmu04070 | Phosphatidylinositol signaling system | 10 | 0.10 | 0.024 | 2.36 | 0.98 | 0.15 | 25.29 |
| mmu05214 | Glioma                                | 9  | 0.09 | 0.026 | 2.49 | 0.98 | 0.16 | 27.18 |
| mmu00562 | Inositol phosphate metabolism         | 8  | 0.08 | 0.030 | 2.62 | 0.99 | 0.17 | 31.02 |
| mmu04720 | Long-term potentiation                | 9  | 0.09 | 0.042 | 2.28 | 1.00 | 0.22 | 40.02 |
| mmu04640 | Hematopoietic cell lineage            | 10 | 0.10 | 0.045 | 2.11 | 1.00 | 0.23 | 42.77 |
| mmu04666 | Fc gamma R-mediated phagocytosis      | 11 | 0.11 | 0.048 | 1.99 | 1.00 | 0.24 | 44.54 |
| mmu04930 | Type II diabetes mellitus             | 7  | 0.07 | 0.055 | 2.53 | 1.00 | 0.26 | 49.48 |
| mmu05010 | Alzheimer's disease                   | 16 | 0.16 | 0.087 | 1.56 | 1.00 | 0.38 | 66.57 |
| mmu04514 | Cell adhesion molecules (CAMs)        | 14 | 0.14 | 0.092 | 1.61 | 1.00 | 0.38 | 68.75 |
| mmu05014 | Amyotrophic lateral sclerosis (ALS)   | 7  | 0.07 | 0.099 | 2.17 | 1.00 | 0.40 | 71.54 |

**Supplementary Table 2. KEGG pathway analysis: Genes enriched within ISP thymocyte gene set.**

| ID       | Term                                                   | Genes                                                                                                                                                                                                                                                                                                                                |
|----------|--------------------------------------------------------|--------------------------------------------------------------------------------------------------------------------------------------------------------------------------------------------------------------------------------------------------------------------------------------------------------------------------------------|
| mmu04510 | Focal adhesion                                         | TLN2, ERBB2, ITGB4, ITGA10, COL2A1, VCL, IGF1R, DOCK1, ITGB8, COL6A2, COL6A1, COL11A1, THBS3, FN1, SHC4, EGFR, COL4A4, PIK3CG, COL4A2, VAV3, FLT1, TNXB, ITGA2, ACTN2, ITGA3, FLNC, KDR, LAMA2, VWF, ITGA9, LAMA1, CCND1, LAMA4, LAMA3, ITGA5, LAMA5, LAMC3, RASGRF1, CCND2, ITGA7, COL1A2, PDGFRA, PDGFRB, RELN, LAMC2, LAMC1, MYLK |
| mmu04512 | ECM-receptor interaction                               | ITGB4, ITGA10, COL2A1, ITGB8, COL6A2, COL6A1, AGRN, COL11A1, THBS3, FN1, COL4A4, COL4A2, TNXB, ITGA2, ITGA3, LAMA2, VWF, ITGA9, LAMA1, LAMA4, LAMA3, ITGA5, LAMC3, LAMA5, ITGA7, COL1A2, RELN, LAMC2, LAMC1                                                                                                                          |
| mmu05410 | Hypertrophic cardiomyopathy (HCM)                      | ITGB4, ITGA10, CACNB2, TTN, TGFB2, ACE, ITGB8, PRKAA2, CACNA2D1, ITGA2, CACNG4, ITGA3, MYH7, MYH6, CACNA2D2, CACNA1S, CACNA2D4, LAMA2, ITGA9, ITGA5, ITGA7, RYR2, CACNA1F, CACNA1C, CACNA1D                                                                                                                                          |
| mmu05412 | Arrhythmogenic right ventricular cardiomyopathy (ARVC) | CACNA2D1, ITGB4, CACNG4, ITGA2, ITGA10, CACNB2, ACTN2, ITGA3, CTNNA1, CACNA1S, CACNA2D2, CACNA2D4, JUP, LAMA2, ITGA9, ITGB8, ITGA5, ITGA7, RYR2, CACNA1F, CACNA1C, CACNA1D                                                                                                                                                           |
| mmu05414 | Dilated cardiomyopathy                                 | CACNA2D1, ITGB4, CACNG4, ITGA2, ITGA10, CACNB2, MYH7, ITGA3, MYH6, TTN, CACNA1S, CACNA2D2, TGFB2, CACNA2D4, LAMA2, ITGA9, ITGA5, ITGB8, ITGA7, RYR2, CACNA1F, CACNA1C, CACNA1D, IGH-VJ558                                                                                                                                            |
| mmu04020 | Calcium signaling pathway                              | PHKA2, ERBB4, ERBB3, ERBB2, PHKA1, PLCB3, PLCB4, PTK2B, PDE1C, PDE1A, NOS2, PPP3CA, IGH-VJ558, EGFR, NOS1, CACNA1I, ITPR3, CACNA1S, ITPR2, P2RX7, RYR3, PLCG2, RYR1, CACNA1G, PDGFRA, RYR2, PDGFRB, CACNA1E, CACNA1F, CACNA1C, CACNA1D, MYLK, CACNA1A, CACNA1B                                                                       |
| mmu02010 | ABC transporters                                       | ABCB11, ABCA8A, CFTR, ABCA1, ABCA4, ABCA3, ABCA6, ABCA5, ABCC9, ABCC3, ABCC4, ABCA13, ABCA12                                                                                                                                                                                                                                         |
| mmu05222 | Small cell lung cancer                                 | PIK3CG, COL4A4, COL4A2, ITGA2, ITGA3,                                                                                                                                                                                                                                                                                                |

|          |                                    |                                                                                                                                                                                                                                                              |
|----------|------------------------------------|--------------------------------------------------------------------------------------------------------------------------------------------------------------------------------------------------------------------------------------------------------------|
|          |                                    | LAMA2, LAMA1, CCND1, LAMA4, LAMA3, LAMC3, LAMA5, LAMC2, LAMC1, NOS2, TRAF5, FN1                                                                                                                                                                              |
| mmu04530 | Tight junction                     | SYMPK, INADL, MYH15, MAGI2, MAGI1, MPDZ, MYH2, CASK, ACTN2, MYH7, MYH6, CTNNA1, CSDA, MYH8, TJP1, CTTN, CGN, MYH11, MYH13, TJP2, MYH7B, MYH10                                                                                                                |
| mmu04810 | Regulation of actin cytoskeleton   | FGFR2, FGD1, ENAH, SSH1, ITGAE, ITGB4, ITGA10, ITGAM, VCL, DOCK1, ITGAX, ITGB8, GSN, FN1, PIK3CG, EGFR, VAV3, ITGA2, ACTN2, ITGA3, NCKAP1, ITGA9, ITGA5, ITGA7, PDGFRA, CYFIP1, PDGFRB, MYLK, MYH10                                                          |
| mmu04730 | Long-term depression               | NOS1, LYN, GRIA3, ITPR3, ITPR2, IGF1R, PLCB3, PLA2G4A, PLCB4, GRIA2, JMJD7, RYR1, CRH, CACNA1A                                                                                                                                                               |
| mmu04260 | Cardiac muscle contraction         | CACNA2D1, COX7A1, CACNG4, CACNB2, MYH7, ATP1A2, MYH6, CACNA2D2, CACNA1S, CACNA2D4, RYR2, CACNA1F, CACNA1C, CACNA1D                                                                                                                                           |
| mmu04010 | MAPK signaling pathway             | FGFR2, CACNB2, TGFB2, MAP3K5, PPP3CA, EGFR, CACNA2D1, CACNA1I, CACNG4, NR4A1, FLNC, CACNA2D2, CACNA1S, CACNA2D4, RPS6KA6, PLA2G4A, RASGRF2, RASGRF1, JMJD7, CACNA1G, PDGFRA, PDGFRB, CACNA1E, CACNA1F, MAPK8IP1, CACNA1C, CACNA1D, MAP3K12, CACNA1A, CACNA1B |
| mmu05200 | Pathways in cancer                 | FGFR2, DCC, ERBB2, STK36, TGFB2, IGF1R, NOS2, TRAF5, FN1, COL4A4, EGFR, PIK3CG, COL4A2, FLT3, ITGA2, ITGA3, CTNNA1, DAPK1, LAMA2, JUP, LAMA1, CCND1, LAMA4, CDKN1A, LAMA3, NCOA4, LAMC3, LAMA5, PLCG2, PDGFRA, PDGFRB, LAMC2, LAMC1                          |
| mmu05416 | Viral myocarditis                  | MYH15, MYH2, MYH7, MYH6, MYH8, LAMA2, CCND1, H2-BL, MYH11, H2-T22, MYH13, MYH7B, IGH-VJ558, MYH10                                                                                                                                                            |
| mmu04360 | Axon guidance                      | DCC, ABLIM2, PLXNA4, PLXNA1, PLXNA2, PLXNB1, PLXNB2, L1CAM, EPHB4, SEMA4G, SEMA4C, SRGAP3, ROBO2, PPP3CA, ROBO3, SRGAP1                                                                                                                                      |
| mmu04270 | Vascular smooth muscle contraction | NPR1, NPR2, ITPR3, CACNA1S, ITPR2, PLCB3, PLA2G4A, PLCB4, CYP4A32, JMJD7, MYH11, CACNA1F, CACNA1C, CACNA1D, MYLK                                                                                                                                             |

|          |                                       |                                                                                                                                     |
|----------|---------------------------------------|-------------------------------------------------------------------------------------------------------------------------------------|
| mmu04912 | GnRH signaling pathway                | EGFR, PLD1, ITPR3, CACNA1S, ITPR2, PLCB3, PLA2G4A, PLCB4, PTK2B, JMJD7, CACNA1F, CACNA1C, CACNA1D                                   |
| mmu04520 | Adherens junction                     | EGFR, IGF1R, TJP1, SORBS1, ERBB2, PVRL3, LMO7, ACTN2, CTNNA1, VCL, FARP2                                                            |
| mmu00230 | Purine metabolism                     | XDH, ENPP1, NPR1, NPR2, PDE10A, AK7, GUCY2C, AMPD1, PDE6A, PDE7B, PDE2A, CYP4A32, PDE1C, POLD1, PDE1A, ENTPD8, PDE8B                |
| mmu04144 | Endocytosis                           | EGFR, FGFR2, PLD1, FLT1, ERBB4, ERBB3, PSD3, EEA1, KDR, IGF1R, RAB31, TFRC, RABEP1, WWP1, H2-BL, PDGFRA, H2-T22, ITCH, AGAP1, ARAP2 |
| mmu04012 | ErbB signaling pathway                | EGFR, PIK3CG, CDKN1A, EIF4EBP1, ERBB4, ERBB3, ERBB2, PLCG2, GAB1, NRG2, SHC4                                                        |
| mmu04070 | Phosphatidylinositol signaling system | PIK3CG, PLCB3, PLCB4, PIK3C2G, PIK3C2A, PLCG2, SYNJ2, INPP4B, ITPR3, ITPR2                                                          |
| mmu05214 | Glioma                                | EGFR, PIK3CG, IGF1R, CDKN1A, CCND1, PLCG2, PDGFRA, PDGFRB, SHC4                                                                     |
| mmu00562 | Inositol phosphate metabolism         | PIK3CG, PLCB3, PLCB4, PIK3C2G, PIK3C2A, PLCG2, SYNJ2, INPP4B                                                                        |
| mmu04720 | Long-term potentiation                | RPS6KA6, PLCB3, PLCB4, GRIA2, GRIN2B, PPP3CA, ITPR3, CACNA1C, ITPR2                                                                 |
| mmu04640 | Hematopoietic cell lineage            | CR2, TFRC, FLT3, ITGA5, ITGA2, ITGA3, IL5RA, IL7R, IGH-VJ558, ITGAM                                                                 |
| mmu04666 | Fc gamma R-mediated phagocytosis      | PIK3CG, PLA2G4A, DOCK2, PLD1, VAV3, LYN, GSN, PLCG2, PPAP2B, IGH-VJ558, AMPH                                                        |
| mmu04930 | Type II diabetes mellitus             | PIK3CG, CACNA1G, CACNA1E, CACNA1C, CACNA1D, CACNA1A, CACNA1B                                                                        |
| mmu05010 | Alzheimer's disease                   | NOS1, COX7A1, SNCA, ITPR3, CACNA1S, ITPR2, NDUFV3, PLCB3, LRP1, PLCB4, GRIN2B, RYR3, PPP3CA, CACNA1F, CACNA1C, CACNA1D              |
| mmu04514 | Cell adhesion molecules (CAMs)        | CD276, NFASC, LICAM, ITGAM, ALCAM, ITGA9, ITGB8, PVRL3, ICOS, H2-BL, CNTNAP2, H2-T22, CNTNAP1, CD226                                |
| mmu05014 | Amyotrophic lateral sclerosis (ALS)   | ALS2, MAP3K5, NOS1, GRIA2, GRIN2B, PPP3CA, CAT                                                                                      |
